# Supplementary material for: Proof-of-concept study of an at-home, engaging, digital intervention for pediatric ADHD
Source: PubMed Central journal article supplement (PMC5764249; doi:10.1371/journal.pone.0189749), 2018-01-11
Supplement: pone.0189749.s002.pdf [file pone.0189749.s002.pdf]

**S1 Table. TOVA raw score D Prime components for the ADHD and control groups.**

| Outcome                                 | Group            | N  | Mean-Pre (SD)  | Mean-Post(SD)    | Test Statistic<br>(T/Z) | P Value | Effect Size<br>d(r) | 95% CI (U L)     |
|-----------------------------------------|------------------|----|----------------|------------------|-------------------------|---------|---------------------|------------------|
| RT Mean<br>Standard<br>Score            | ADHD             | 40 | 83.418(21.161) | 87.649(22.315)   | -1.3(T)                 | 0.201   | 0.206               | (-10.815 2.353)  |
|                                         | ADHD<br>Subgroup | 22 | 77.616(17.583) | 90.773(21.128)** | -3.031(T)               | 0.006   | 0.646               | (-22.185 -4.129) |
|                                         | Control          | 40 | 92.709(21.001) | 94.391(15.02)    | -0.682(T)               | 0.499   | 0.108               | (-6.668 3.305)   |
| Variance<br>Standard<br>Score           | ADHD             | 40 | 61.065(34.999) | 72.004(28.602)   | -1.613(Z)               | 0.109   | 0.266(0.255)        | (-19.586 1.392)  |
|                                         | ADHD<br>Subgroup | 22 | 46.916(38.65)  | 73.337(26.947)*  | -2.893(T)               | 0.009   | 0.617               | (-45.416 -7.425) |
|                                         | Control          | 40 | 81.8(21.785)   | 83.998(21.968)   | -0.645(T)               | 0.523   | 0.102               | (-9.093 4.696)   |
| Comission<br>Error<br>Standard<br>Score | ADHD             | 40 | 83.817(21.43)  | 88.006(22.194)   | -1.203(Z)               | 0.234   | 0.163(0.19)         | (-10.623 2.931)  |
|                                         | ADHD<br>Subgroup | 22 | 81.951(15.706) | 86.998(19.361)   | -1.251(T)               | 0.225   | 0.267               | (-13.434 3.341)  |
|                                         | Control          | 40 | 90.198(21.553) | 91.525(20.623)   | -0.429(T)               | 0.67    | 0.068               | (-7.575 4.923)   |
| Omission<br>Error<br>Standard           | ADHD             | 40 | 40.951(80.797) | -12.32(207.045)* | 2.386(Z)                | 0.016   | 0.319(0.377)        | (3.335 46.021)   |
|                                         | ADHD<br>Subgroup | 22 | 37.879(88.437) | 8.653(128.149)   | 1.104(Z)                | 0.283   | 0.386(0.235)        | (-7.892 52.869)  |

|                              |          |    |                 |                   |          |       |              |                  |
|------------------------------|----------|----|-----------------|-------------------|----------|-------|--------------|------------------|
| Score                        | Control  | 40 | 58.765(81.347)  | 18.496(155.73)*   | 2.05(Z)  | 0.04  | 0.331(0.324) | (0.323 32.334)   |
| D Prime<br>Standard<br>Score | ADHD     | 40 | 76.368(7.654)   | 75.825(11.408)    | 0.364(T) | 0.718 | 0.058        | (-2.471 3.557)   |
|                              | Subgroup | 22 | 75.036(7.246)   | 75.396(9.566)     | -0.86(Z) | 0.406 | 0.05(0.183)  | (-3.858 2.048)   |
|                              | Control  | 40 | 82.42(11.498)   | 79.985(13.73)*    | 1.976(Z) | 0.048 | 0.22(0.312)  | (0.011 5.803)    |
| ExGaussian<br>TAU            | ADHD     | 40 | 215.86(75.031)  | 185.301(66.832)*  | 2.141(T) | 0.039 | 0.339        | (1.691 59.428)   |
|                              | Subgroup | 22 | 254.034(72.418) | 189.262(71.646)** | 3.213(T) | 0.004 | 0.685        | (22.848 106.697) |
|                              | Control  | 40 | 169.806(58.412) | 156.193(57.899)   | 1.505(Z) | 0.135 | 0.241(0.238) | (-3.596 24.868)  |

\* indicates statistical significance at an alpha of 0.05 (2-tailed) for pre- to post-intervention difference within group.

\*\* indicates statistical significance after a Bonferroni correction of  $0.05/5 = 0.01$ .

For each variable and group, the normality assumption for T-Tests was verified using a Shapiro-Wilks test. If the Shapiro-Wilks test indicated that the distribution of scores did not meet normality, a Wilcoxon rank sum test was performed instead. In the Test Statistic column this is indicated by a (T) or (Z) after the test statistic indicating if a T-Test (T) or a Wilcoxon test (Z) was performed. P values were calculated according to the statistical test run. Effect sizes are Cohen's d with rank-sum correlation in parentheses if appropriate.
