# Supplementary material for: Proof-of-concept study of an at-home, engaging, digital intervention for pediatric ADHD
Source: PubMed Central journal article supplement (PMC5764249; doi:10.1371/journal.pone.0189749), 2018-01-11
Supplement: pone.0189749.s003.pdf [file pone.0189749.s003.pdf]

**S2 Table. CANTAB Spatial Working Memory**

| Outcome                             | Group         | N  | Mean-Pre (SD)       | Mean-Post(SD)         | Test Statistic (T/Z) | P Value | Effect Size d(r) | 95% CI (U L)     |
|-------------------------------------|---------------|----|---------------------|-----------------------|----------------------|---------|------------------|------------------|
| Between Errors                      | ADHD          | 40 | 18.975(7.921)       | 17.275(8.527)         | 1.255(T)             | 0.217   | 0.198            | (-1.041 4.441)   |
|                                     | ADHD Subgroup | 22 | 19.591(7.805)       | 18.227(9.263)         | 0.678(T)             | 0.505   | 0.145            | (-2.819 5.547)   |
|                                     | Control       | 40 | 17.575(9.397)       | 16.3(9.433)           | 0.957(T)             | 0.344   | 0.151            | (-1.419 3.969)   |
| Double Errors                       | ADHD          | 40 | 0.35(0.622)         | 0.5(0.934)            | -0.429(Z)            | 0.672   | 0.146(0.068)     | (-1 1)           |
|                                     | ADHD Subgroup | 22 | 0.364(0.658)        | 0.364(0.727)          | 0.277(Z)             | 0.984   | 0(0.059)         | (-1.5 1.5)       |
|                                     | Control       | 40 | 0.425(0.984)        | 0.35(0.77)            | 0.264(Z)             | 0.809   | 0.063(0.042)     | (-1 1)           |
| Mean time to First Response 4 Boxes | ADHD          | 40 | 1894.525(1307.187)  | 1213.4(314.669)**     | 4.194(Z)             | <0.001  | 0.574(0.663)     | (248.75 678.75)  |
|                                     | ADHD Subgroup | 22 | 2147.5(1521.651)    | 1291.455(330.797)**   | 3.587(Z)             | <0.001  | 0.642(0.765)     | (288.25 1016.75) |
|                                     | Control       | 40 | 1927.338(1858.711)  | 1284.175(501.945)**   | 3.602(Z)             | <0.001  | 0.353(0.57)      | (143 514.75)     |
| Mean Time to Last                   | ADHD          | 40 | 15333.15(3287.435)  | 12084.275(1542.645)** | 5.269(Z)             | <0.001  | 1.092(0.833)     | (2157.5 3664.5)  |
|                                     | ADHD          | 22 | 16175.636(3733.025) | 12487.773(1776.035)** | 3.912(Z)             | <0.001  | 1.049(0.834)     | (2003.5 4905.25) |

|             |          |    |                     |                      |          |        |              |                    |
|-------------|----------|----|---------------------|----------------------|----------|--------|--------------|--------------------|
| Response 4  | Subgroup |    |                     |                      |          |        |              |                    |
| Boxes       | Control  | 40 | 15035.488(3499.211) | 13052.05(2203.998)** | 4.18(Z)  | <0.001 | 0.67(0.661)  | (873.75 2527.5)    |
| Mean Token  | ADHD     | 40 | 1245.756(473.744)   | 817.381(188.443)**   | 5.256(Z) | <0.001 | 1.063(0.831) | (267.438 510.688)  |
| Search      | ADHD     |    |                     |                      |          |        |              |                    |
| Preparation | Subgroup | 22 | 1337.335(525.314)   | 861.522(202.678)**   | 3.945(Z) | <0.001 | 1.11(0.841)  | (262.253 637.568)  |
| Time 4      |          |    |                     |                      |          |        |              |                    |
| Boxes       | Control  | 40 | 1227.375(632.854)   | 942.575(260.657)**   | 3.676(Z) | <0.001 | 0.545(0.581) | (98.688 344.69)    |
| SD Time to  | ADHD     | 40 | 758.584(1021.912)   | 298.611(307.757)**   | 3.844(Z) | <0.001 | 0.531(0.608) | (158.391 518.308)  |
| First       | ADHD     |    |                     |                      |          |        |              |                    |
| Response    | Subgroup | 22 | 956.522(1301.225)   | 321.027(357.91)**    | 3.458(Z) | <0.001 | 0.602(0.737) | (179.959 691.903)  |
|             | Control  | 40 | 912.398(2447.527)   | 286.873(360.143)*    | 2.07(Z)  | 0.038  | 0.251(0.327) | (4.95 299.46)      |
| SD Time to  | ADHD     | 40 | 1708.9(1849.87)     | 839.371(921.141)**   | 3.589(Z) | <0.001 | 0.528(0.567) | (297.341 937.624)  |
| Last        | ADHD     |    |                     |                      |          |        |              |                    |
| Response 4  | Subgroup | 22 | 1930.209(2100.86)   | 1048.382(1142.766)*  | 2.386(Z) | 0.016  | 0.488(0.509) | (103.592 1129.253) |
| Boxes       | Control  | 40 | 1858.859(2978.088)  | 1260.877(1301.018)   | 0.753(Z) | 0.46   | 0.184(0.119) | (-323.856 748.471) |
| SD Token    | ADHD     | 40 | 721.079(664.592)    | 368.823(156.479)**   | 4.194(Z) | <0.001 | 0.588(0.663) | (118.996 382.036)  |
| Search      | ADHD     |    |                     |                      |          |        |              |                    |
| Preparation | Subgroup | 22 | 871.935(793.08)     | 411.937(155.504)**   | 3.587(Z) | <0.001 | 0.657(0.765) | (135.913 578.045)  |

|                     |                  |    |                   |                   |           |       |              |                 |
|---------------------|------------------|----|-------------------|-------------------|-----------|-------|--------------|-----------------|
| Time 4<br>Boxes     | Control          | 40 | 769.768(1206.306) | 415.354(249.53)** | 3.011(Z)  | 0.002 | 0.302(0.476) | (50.74 223.006) |
| Stratagy            | ADHD             | 40 | 17.925(2.495)     | 17(2.522)*        | 2.578(T)  | 0.014 | 0.408        | (0.199 1.651)   |
|                     | ADHD<br>Subgroup | 22 | 17.955(2.984)     | 16.682(2.514)*    | 2.261(T)  | 0.034 | 0.482        | (0.102 2.443)   |
|                     | Control          | 40 | 17.35(2.94)       | 17.15(2.975)      | 0.403(T)  | 0.689 | 0.064        | (-0.804 1.204)  |
| Stratagy 4<br>Boxes | ADHD             | 40 | 22.95(2.873)      | 21.575(2.845)**   | 3.193(T)  | 0.003 | 0.505        | (0.504 2.246)   |
|                     | ADHD<br>Subgroup | 22 | 23.045(3.387)     | 21.455(3.004)*    | 2.526(T)  | 0.02  | 0.538        | (0.281 2.901)   |
|                     | Control          | 40 | 22.65(3.655)      | 21.8(3.51)        | 1.407(T)  | 0.167 | 0.223        | (-0.372 2.072)  |
| Total Errors        | ADHD             | 40 | 19.15(7.95)       | 17.575(8.741)     | 1.156(T)  | 0.255 | 0.183        | (-1.181 4.331)  |
|                     | ADHD<br>Subgroup | 22 | 19.864(7.797)     | 18.364(9.373)     | 0.738(T)  | 0.469 | 0.157        | (-2.726 5.726)  |
|                     | Control          | 40 | 17.95(9.648)      | 16.475(9.568)     | 1.055(T)  | 0.298 | 0.167        | (-1.352 4.302)  |
| Within<br>Errors    | ADHD             | 40 | 0.525(0.905)      | 0.8(1.4)          | -0.831(Z) | 0.417 | 0.177(0.131) | (-1.5 0.5)      |
|                     | ADHD<br>Subgroup | 22 | 0.636(1.093)      | 0.5(0.859)        | 0.554(Z)  | 0.637 | 0.106(0.118) | (-1.5 2)        |
|                     | Control          | 40 | 0.8(2.015)        | 0.525(1.24)       | 0.761(Z)  | 0.472 | 0.117(0.12)  | (-1.5 2.5)      |

\* indicates statistical significance at an alpha of 0.05 (2-tailed) for pre- to post-intervention difference within group.

\*\* indicates statistical significance after a Bonferroni correction of  $0.05/12 = 0.004$ .

For each variable and group, the normality assumption for T-Tests was verified using a Shapiro-Wilks test. If the Shapiro-Wilks test indicated that the distribution of scores did not meet normality, a Wilcoxon rank sum test was performed instead. In the Test Statistic column this is indicated by a (T) or (Z) after the test statistic indicating if a T-Test (T) or a Wilcoxon test (Z) was performed. P values were calculated according to the statistical test run. Effect sizes are Cohen's d with rank-sum correlation in parentheses if appropriate.
