# Supplementary material for: Proof-of-concept study of an at-home, engaging, digital intervention for pediatric ADHD
Source: PubMed Central journal article supplement (PMC5764249; doi:10.1371/journal.pone.0189749), 2018-01-11
Supplement: pone.0189749.s004.pdf [file pone.0189749.s004.pdf]

**S3 Table. Rapid Visual Processing**

| Outcome        | Group         | N  | Mean-Pre (SD)    | Mean-Post(SD)      | Test Statistic (T/Z) | P Value | Effect Size d(r) | 95% CI (U L)     |
|----------------|---------------|----|------------------|--------------------|----------------------|---------|------------------|------------------|
| A Prime        | ADHD          | 40 | 0.789(0.05)      | 0.805(0.055)*      | -2.119(T)            | 0.04    | 0.335            | (-0.031 -0.001)  |
|                | ADHD Subgroup | 22 | 0.798(0.044)     | 0.792(0.058)       | 0.655(T)             | 0.52    | 0.14             | (-0.014 0.026)   |
|                | Control       | 40 | 0.808(0.046)     | 0.834(0.058)**     | -3.848(T)            | <0.001  | 0.608            | (-0.039 -0.012)  |
| B Prime        | ADHD          | 40 | 0.706(0.27)      | 0.732(0.224)       | -0.874(Z)            | 0.39    | 0.116(0.138)     | (-0.071 0.039)   |
|                | ADHD Subgroup | 22 | 0.742(0.249)     | 0.689(0.236)       | 1.306(T)             | 0.206   | 0.279            | (-0.032 0.139)   |
|                | Control       | 40 | 0.853(0.158)     | 0.827(0.186)       | 1.169(Z)             | 0.248   | 0.15(0.185)      | (-0.012 0.057)   |
| Mean Latency   | ADHD          | 40 | 671.89(176.507)  | 607.429(165.438)*  | 2.678(T)             | 0.011   | 0.423            | (15.765 113.156) |
|                | ADHD Subgroup | 22 | 668.972(203.718) | 617.704(179.596)   | 1.394(T)             | 0.178   | 0.297            | (-25.21 127.745) |
|                | Control       | 40 | 616.072(163.363) | 549.698(140.712)** | 3.898(Z)             | <0.001  | 0.498(0.616)     | (34.998 95.933)  |
| Probability of | ADHD          | 40 | 0.055(0.082)     | 0.042(0.048)       | 0.538(Z)             | 0.599   | 0.179(0.085)     | (-0.007 0.014)   |

|                          |          |    |                  |                   |           |        |              |                  |
|--------------------------|----------|----|------------------|-------------------|-----------|--------|--------------|------------------|
| False Alarm              | ADHD     |    |                  |                   |           |        |              |                  |
|                          | Subgroup | 22 | 0.043(0.057)     | 0.049(0.048)      | -0.622(T) | 0.541  | 0.133        | (-0.026 0.014)   |
|                          | Control  | 40 | 0.018(0.026)     | 0.023(0.032)      | -1.075(Z) | 0.289  | 0.189(0.17)  | (-0.006 0.001)   |
| Probability of Hit       | ADHD     | 40 | 0.334(0.135)     | 0.371(0.124)      | -1.624(T) | 0.112  | 0.257        | (-0.083 0.009)   |
|                          | ADHD     |    |                  |                   |           |        |              |                  |
|                          | Subgroup | 22 | 0.339(0.118)     | 0.355(0.114)      | -0.492(T) | 0.628  | 0.105        | (-0.084 0.052)   |
|                          | Control  | 40 | 0.31(0.139)      | 0.409(0.2)**      | -4.369(T) | <0.001 | 0.691        | (-0.146 -0.053)  |
| SD Latency               | ADHD     | 40 | 316.615(122.399) | 308.776(105.853)  | 0.36(T)   | 0.721  | 0.057        | (-36.217 51.895) |
|                          | ADHD     |    |                  |                   |           |        |              |                  |
|                          | Subgroup | 22 | 320.04(115.998)  | 314.067(116.257)  | 0.237(T)  | 0.815  | 0.05         | (-46.514 58.461) |
|                          | Control  | 40 | 269.9(115.645)   | 266.67(115.782)   | 0.192(T)  | 0.849  | 0.03         | (-30.867 37.327) |
| Total Correct Rejections | ADHD     | 40 | 440.575(36.409)  | 451.85(27.58)*    | -2.481(Z) | 0.012  | 0.361(0.392) | (-15 -2)         |
|                          | ADHD     |    |                  |                   |           |        |              |                  |
|                          | Subgroup | 22 | 446.5(26.133)    | 447.227(28.574)   | -0.166(T) | 0.87   | 0.035        | (-9.847 8.392)   |
|                          | Control  | 40 | 458(18.383)      | 466.825(26.952)** | -3.152(T) | 0.003  | 0.498        | (-14.487 -3.163) |
| Total False Alarms       | ADHD     | 40 | 25.925(39.316)   | 19.775(22.758)    | 0.504(Z)  | 0.62   | 0.182(0.08)  | (-3.5 7)         |
|                          | ADHD     |    |                  |                   |           |        |              |                  |
|                          | Subgroup | 22 | 20.227(27.041)   | 22.818(22.187)    | -0.576(T) | 0.571  | 0.123        | (-11.949 6.767)  |

|              |               |    |               |                |           |        |              |                 |
|--------------|---------------|----|---------------|----------------|-----------|--------|--------------|-----------------|
|              | Control       | 40 | 8.325(11.93)  | 10.725(15.274) | -1.315(Z) | 0.192  | 0.204(0.208) | (-4.5 1)        |
| Total Hits   | ADHD          | 40 | 18(7.278)     | 20(6.653)      | -1.627(T) | 0.112  | 0.257        | (-4.486 0.486)  |
|              | ADHD Subgroup | 22 | 18.273(6.318) | 19.136(6.105)  | -0.493(T) | 0.627  | 0.105        | (-4.505 2.778)  |
|              | Control       | 40 | 16.725(7.511) | 22.1(10.775)** | -4.369(T) | <0.001 | 0.691        | (-7.864 -2.886) |
| Total Misses | ADHD          | 40 | 35.975(7.308) | 33.975(6.685)  | 1.619(T)  | 0.114  | 0.256        | (-0.499 4.499)  |
|              | ADHD Subgroup | 22 | 35.682(6.38)  | 34.818(6.177)  | 0.489(T)  | 0.63   | 0.104        | (-2.811 4.538)  |
|              | Control       | 40 | 37.275(7.511) | 31.9(10.775)** | 4.369(T)  | <0.001 | 0.691        | (2.886 7.864)   |

\* indicates statistical significance at an alpha of 0.05 (2-tailed) for difference from pre- to post-intervention within group.

\*\* indicates statistical significance after a Bonferroni correction of  $0.05/10 = 0.005$ .

For each variable and group, the normality assumption for T-Tests was verified using a Shapiro-Wilks test. If the Shapiro-Wilks test indicated that the distribution of scores did not meet normality, a Wilcoxon rank sum test was performed instead. In the Test Statistic column this is indicated by a (T) or (Z) after the test statistic indicating if a T-Test (T) or a Wilcoxon test (Z) was performed. P values were calculated according to the statistical test run. Effect sizes are Cohen's d with rank-sum correlation in parentheses if appropriate.
