# Supplementary material for: Proof-of-concept study of an at-home, engaging, digital intervention for pediatric ADHD
Source: PubMed Central journal article supplement (PMC5764249; doi:10.1371/journal.pone.0189749), 2018-01-11
Supplement: pone.0189749.s005.pdf [file pone.0189749.s005.pdf]

**S4 Table. CANTAB Delayed Match to Sample**

| Outcome                    | Group            | N  | Mean-Pre (SD) | Mean-Post(SD)  | Test<br>Statistic<br>(T/Z) | P<br>Value | Effect Size<br>d(r) | 95% CI (U L)   |
|----------------------------|------------------|----|---------------|----------------|----------------------------|------------|---------------------|----------------|
| A Prime                    | ADHD             | 40 | 0.289(0.335)  | 0.229(0.285)   | 0.918(T)                   | 0.364      | 0.145               | (-0.072 0.191) |
|                            | ADHD<br>Subgroup | 22 | 0.28(0.316)   | 0.22(0.286)    | 0.647(T)                   | 0.525      | 0.138               | (-0.134 0.255) |
|                            | Control          | 40 | 0.312(0.318)  | 0.104(0.362)*  | 2.491(Z)                   | 0.012      | 0.403(0.394)        | (0.042 0.63)   |
| D Prime                    | ADHD             | 40 | -0.493(0.553) | -0.547(0.473)  | 0.497(T)                   | 0.622      | 0.079               | (-0.164 0.271) |
|                            | ADHD<br>Subgroup | 22 | -0.498(0.55)  | -0.512(0.473)  | 0.085(T)                   | 0.933      | 0.018               | (-0.322 0.349) |
|                            | Control          | 40 | -0.333(0.518) | -0.598(0.533)* | 2.181(T)                   | 0.035      | 0.345               | (0.019 0.511)  |
| Errors<br>Correct<br>Color | ADHD             | 40 | 2(1.601)      | 1.775(1.368)   | 1.215(Z)                   | 0.233      | 0.122(0.192)        | (-0.5 1.5)     |
|                            | ADHD<br>Subgroup | 22 | 1.909(1.63)   | 1.591(1.469)   | 0.688(T)                   | 0.499      | 0.147               | (-0.643 1.28)  |
|                            | Control          | 40 | 2.25(1.676)   | 1.675(1.76)*   | 2.345(T)                   | 0.024      | 0.371               | (0.079 1.071)  |
| Errors<br>Correct          | ADHD             | 40 | 1.75(1.515)   | 1.525(1.154)   | 0.844(T)                   | 0.404      | 0.133               | (-0.314 0.764) |
|                            | ADHD             | 22 | 2.091(1.601)  | 1.727(1.162)   | 0.954(T)                   | 0.351      | 0.203               | (-0.429 1.156) |

|                               |                  |    |                    |                     |           |       |              |                    |
|-------------------------------|------------------|----|--------------------|---------------------|-----------|-------|--------------|--------------------|
| Shape                         | Subgroup         |    |                    |                     |           |       |              |                    |
|                               | Control          | 40 | 1.525(1.358)       | 1.2(1.018)          | 1.407(Z)  | 0.169 | 0.245(0.223) | (0 1.5)            |
| Errors Novel<br>Distractor    | ADHD             | 40 | 0.425(0.636)       | 0.725(1.012)        | -1.587(Z) | 0.114 | 0.254(0.251) | (-1 0)             |
|                               | ADHD<br>Subgroup | 22 | 0.545(0.671)       | 0.682(0.945)        | -0.568(T) | 0.576 | 0.121        | (-0.635 0.363)     |
|                               | Control          | 40 | 0.25(0.494)        | 0.325(0.764)        | -0.044(Z) | 1     | 0.094(0.007) | (-1.5 1)           |
| Mean<br>Choices to<br>Correct | ADHD             | 40 | 1.309(0.208)       | 1.311(0.219)        | -0.063(T) | 0.95  | 0.01         | (-0.09 0.084)      |
|                               | ADHD<br>Subgroup | 22 | 1.361(0.226)       | 1.316(0.218)        | 0.702(T)  | 0.49  | 0.15         | (-0.089 0.179)     |
|                               | Control          | 40 | 1.285(0.235)       | 1.214(0.192)**      | 2.941(Z)  | 0.003 | 0.474(0.465) | (0.025 0.15)       |
| Mean<br>Correct<br>Latency    | ADHD             | 40 | 3838.253(1004.022) | 4033.465(1411.669)  | -0.659(Z) | 0.519 | 0.176(0.104) | (-534.77 260.485)  |
|                               | ADHD<br>Subgroup | 22 | 3967.934(1056.867) | 4519.585(1463.618)* | -2.101(T) | 0.048 | 0.448        | (-1097.698 -5.604) |
|                               | Control          | 40 | 3832.673(1224.693) | 3735.877(1032.766)  | 0.571(T)  | 0.571 | 0.09         | (-245.842 439.435) |
| Mean<br>Correct               | ADHD             | 40 | 3975.09(1172.726)  | 4069.029(1567.16)   | -0.525(T) | 0.602 | 0.083        | (-455.728 267.85)  |

|                                             |                  |    |                  |                    |           |       |              |                        |
|---------------------------------------------|------------------|----|------------------|--------------------|-----------|-------|--------------|------------------------|
| Latency All<br>Delays                       | ADHD<br>Subgroup | 22 | 4045.57(1173.69) | 4527.342(1651.793) | -1.87(T)  | 0.075 | 0.399        | (-<br>1017.506 53.96)  |
|                                             | Control          | 40 | 3948.5(1351.799) | 3868.191(1168.202) | 0.439(T)  | 0.663 | 0.069        | (-<br>289.589 450.208) |
| Percent<br>Correct                          | ADHD             | 40 | 79.125(11.706)   | 79.875(11.463)     | -0.327(T) | 0.746 | 0.052        | (-5.395 3.895)         |
|                                             | ADHD<br>Subgroup | 22 | 77.273(12.605)   | 80(11.952)         | -0.777(T) | 0.446 | 0.166        | (-10.023 4.569)        |
|                                             | Control          | 40 | 79.875(12.785)   | 84(11.613)*        | -2.611(T) | 0.013 | 0.413        | (-7.321 -0.929)        |
| Percent<br>Correct All<br>Delays            | ADHD             | 40 | 73.833(15.351)   | 74.833(14.04)      | -0.348(T) | 0.729 | 0.055        | (-6.805 4.805)         |
|                                             | ADHD<br>Subgroup | 22 | 71.515(16.353)   | 74.545(14.926)     | -0.685(T) | 0.501 | 0.146        | (-12.231 6.17)         |
|                                             | Control          | 40 | 75.5(14.822)     | 80.333(13.499)*    | -2.293(T) | 0.027 | 0.363        | (-9.097 -0.569)        |
| Probability<br>of Error<br>Given<br>Correct | ADHD             | 40 | 0.219(0.135)     | 0.219(0.122)       | -0.037(T) | 0.971 | 0.006        | (-0.052 0.05)          |
|                                             | ADHD<br>Subgroup | 22 | 0.231(0.139)     | 0.216(0.127)       | 0.416(T)  | 0.681 | 0.089        | (-0.06 0.09)           |
|                                             | Control          | 40 | 0.205(0.143)     | 0.189(0.175)       | 1.19(Z)   | 0.238 | 0.107(0.188) | (-0.022 0.068)         |
| Probability<br>of Error                     | ADHD             | 40 | 0.2(0.24)        | 0.152(0.19)        | 0.548(Z)  | 0.59  | 0.163(0.087) | (-0.069 0.214)         |
|                                             | ADHD             | 22 | 0.18(0.199)      | 0.149(0.19)        | 0.496(T)  | 0.625 | 0.106        | (-0.098 0.159)         |

|                                     |                  |    |                    |                    |           |       |              |                        |
|-------------------------------------|------------------|----|--------------------|--------------------|-----------|-------|--------------|------------------------|
| Given Error                         | Subgroup         |    |                    |                    |           |       |              |                        |
|                                     | Control          | 40 | 0.191(0.183)       | 0.091(0.143)*      | 2.633(Z)  | 0.007 | 0.454(0.416) | (0.066 0.306)          |
| SD Correct<br>Latency               | ADHD             | 40 | 1873.921(921.102)  | 2139.495(1544.993) | -0.013(Z) | 0.995 | 0.173(0.002) | (-370.6 256.368)       |
|                                     | ADHD<br>Subgroup | 22 | 1975.796(1104.631) | 2635.081(1869.989) | -1.153(Z) | 0.262 | 0.344(0.246) | (-<br>1061.905 203.69) |
|                                     | Control          | 40 | 1793.727(866.628)  | 1752.398(767.867)  | 0.317(T)  | 0.753 | 0.05         | (-<br>222.786 305.444) |
| SD Correct<br>Latency All<br>Delays | ADHD             | 40 | 1932.028(950.722)  | 2093.342(1347.096) | -0.04(Z)  | 0.973 | 0.141(0.006) | (-421.11 308.08)       |
|                                     | ADHD<br>Subgroup | 22 | 2010.047(1120.301) | 2504.436(1589.51)  | -1.38(Z)  | 0.176 | 0.362(0.294) | (-914.67 256.37)       |
|                                     | Control          | 40 | 1916.356(978.547)  | 1789.329(825.578)  | 0.874(T)  | 0.388 | 0.138        | (-167.046 421.1)       |
| Total Correct                       | ADHD             | 40 | 15.825(2.341)      | 15.975(2.293)      | -0.327(T) | 0.746 | 0.052        | (-1.079 0.779)         |
|                                     | ADHD<br>Subgroup | 22 | 15.455(2.521)      | 16(2.39)           | -0.777(T) | 0.446 | 0.166        | (-2.005 0.914)         |
|                                     | Control          | 40 | 15.975(2.557)      | 16.8(2.323)*       | -2.611(T) | 0.013 | 0.413        | (-1.464 -0.186)        |
| Total Correct<br>All Delays         | ADHD             | 40 | 11.075(2.303)      | 11.225(2.106)      | -0.348(T) | 0.729 | 0.055        | (-1.021 0.721)         |
|                                     | ADHD<br>Subgroup | 22 | 10.727(2.453)      | 11.182(2.239)      | -0.685(T) | 0.501 | 0.146        | (-1.835 0.926)         |

|  |         |    |               |               |           |       |       |                 |
|--|---------|----|---------------|---------------|-----------|-------|-------|-----------------|
|  | Control | 40 | 11.325(2.223) | 12.05(2.025)* | -2.293(T) | 0.027 | 0.363 | (-1.365 -0.085) |
|--|---------|----|---------------|---------------|-----------|-------|-------|-----------------|

\* indicates statistical significance at an alpha of 0.05 (2-tailed) for difference from pre- to post-intervention within group.

\*\* indicates statistical significance after a Bonferroni correction of  $0.05/16 = 0.003$ .

The above table shows the results for the CANTAB DMS test. For each outcome the results are presented for the ADHD, ADHD Subgroup, and the Control groups. For each variable and group, the normality assumption for T-Tests was verified using a Shapiro-Wilks test. If the Shapiro-Wilks test indicated that the distribution of scores did not meet normality, a Wilcoxon rank sum test was performed instead. In the Test Statistic column this is indicated by a (T) or (Z) after the test statistic indicating if a T-Test (T) or a Wilcoxon test (Z) was performed. P values were calculated according to the statistical test run. Effect sizes are Cohen's d with rank-sum correlation in parentheses if appropriate.
