# Supplementary material for: Proof-of-concept study of an at-home, engaging, digital intervention for pediatric ADHD
Source: PubMed Central journal article supplement (PMC5764249; doi:10.1371/journal.pone.0189749), 2018-01-11

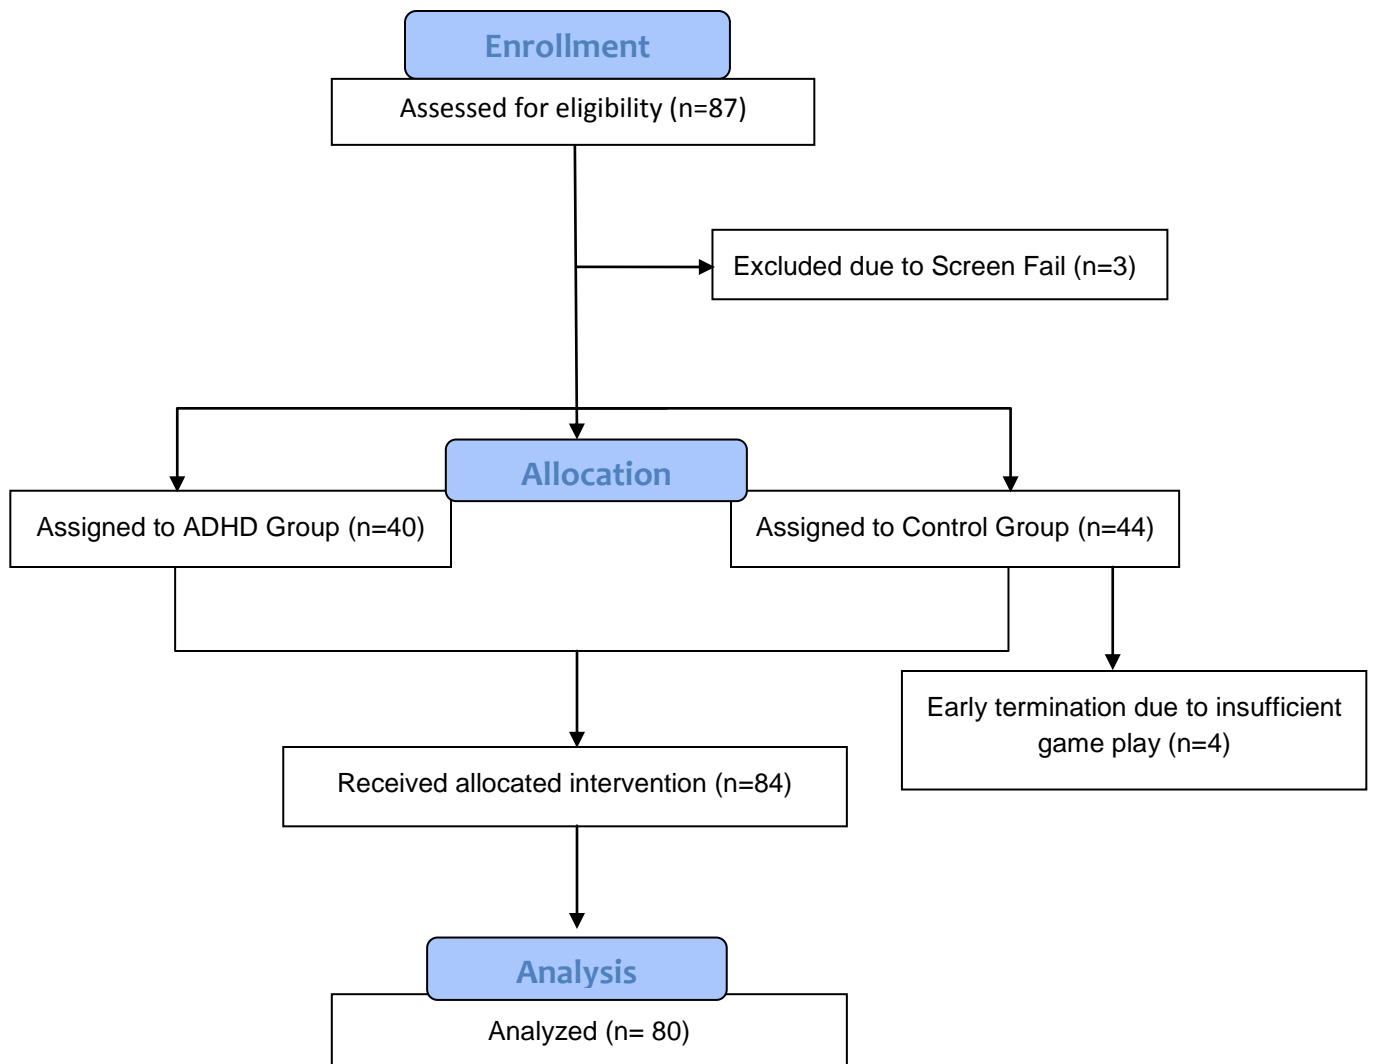

Supplement: pone.0189749.s007.pdf [file pone.0189749.s007.pdf]
